# Supplementary material for: Dual regulation of water retention and cell growth by a stress-associated protein (SAP) gene in Prunus
Source: PubMed Central journal article supplement (PMC5428470; doi:10.1038/s41598-017-00471-7), 2017-03-23
Supplement: 41598_2017_471_MOESM1_ESM.pdf [file 41598_2017_471_MOESM1_ESM.pdf]

**Dual regulation of water retention and cell growth by a *stress-associated protein (SAP)* gene in *Prunus***  
 A. Lloret, A. Conejero, C. Leida, C. Petri, F. Gil-Muñoz, L. Burgos, M.L. Badenes, and G. Ríos

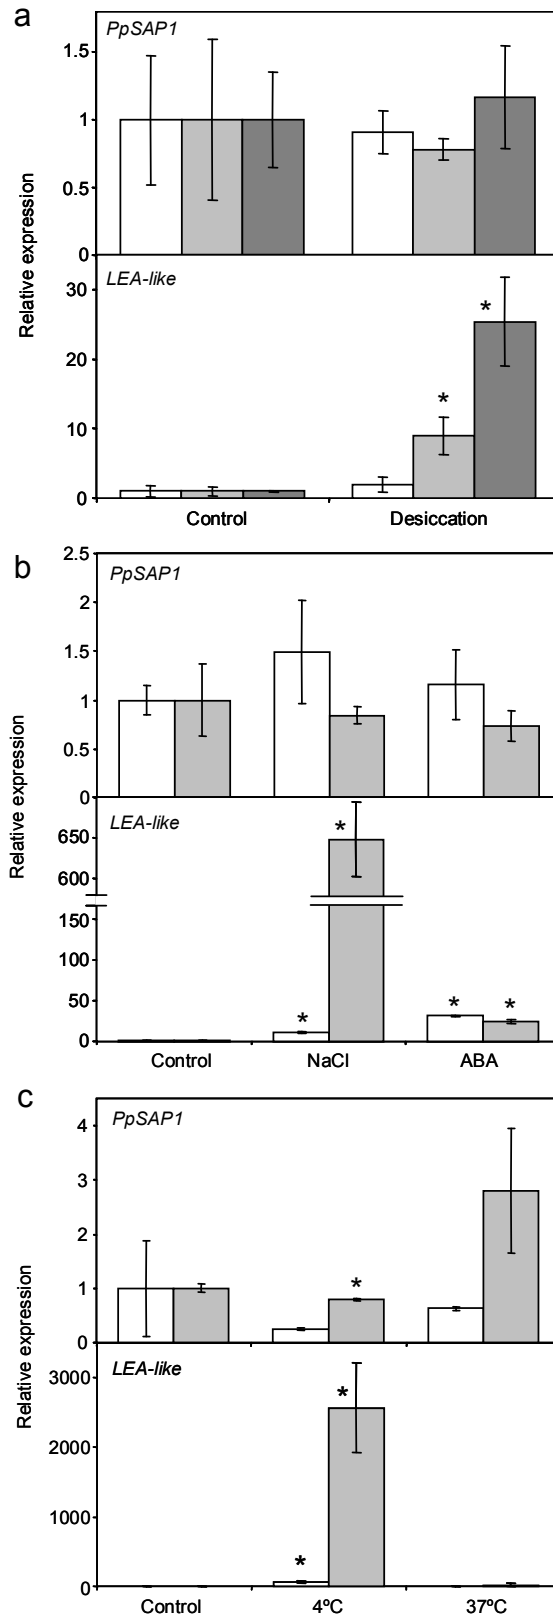

**Figure S1.** *PpSAP1* gene expression in detached leaves and leaf discs under abiotic stresses. In a, detached leaves were desiccated for one (white bars), three (light grey bars) and seven days (dark grey bars). In b and c, leaf discs were treated for four (white bars) and 24 hours (grey bars). An expression value of one is assigned to the control. *LEA-like* gene (*ppa008651m*) expression is included as a positive control of stress response. An asterisk indicates significant difference with the control with a confidence level of 95 %.

ppa005503m

GAGCTCGGACACCATTGACAATGTGAAGGCGAAGATCCAGGACAAGGAGGGAATCCCACCAGACCAGCAGAGGTTGATC  
TTTGCAGGGAAGCAGCTGGAGGACGGCCGTACTTTGGCTGACTACAATATTCAGAAGGAGTCTACCCTTCACCTTGTGC  
TGCGTCTGAGGGGTGGTATGCAGATCTTTGTGAAGACCTTGACTGGAAAGACCATCACGTTGGAGGTGGAGAGCTCGGA  
CACAATCGACAATGTTAAGGCCAAGATCCAGGATAAGGAAGGTATTCCCCCAGACCAGCAGAGGTTGATCTTTGCTGGT  
AAGCAGTTGGAGGATGGAAGGACTCTGGCCGACTATAACATCCAGAAGGAGTCTACCCTTCACCTTGTCTCCGTCTCC  
GTGGTGGTTTTCTAGGAAGTGAAGTCTCTGGTGTACCCTGCTTTTAATGAATGTTTCTGTGGTTCCCTTAAAACAATG  
TTTTTAAGTATGTTTTTTTTAAGTTTCAAGTTTCATGGTACTGTTTCTGCCTCTTGGGGAGGCATTTATCTAGTTTGGTT  
TCCTGGTACTTTTTGTTTAATAAATAAATTTGTTCTTGAATAAAAAAAAAAAAAAAAAAAAAAAAAAAAAA

ppa009116m

GAAGACCCCTTACAGGGAAGACAATAACTTTGGAGGTTGAGAGCTCTGACACTATTGACAATGTCAAAGCTAAGATTCAA  
GACAAGGAGGGGATCCCACCGGACCAGCAGAGGTTGATCTTTGCCGGGAAACAGCTTGAGGATGGTTCGTACCCTTGCAG  
ATTATAATATCCAGAAAGAGTCTACTCTCCATCTTGTCTTCGTCTGCGTGGTGGTGAATTTCTGAGTTAGTCCGTTGGT  
TTTAGTTAGTTTTGTTGGTTATAGTTTGTGTTCTCTAGTGATGGTGGTGGATGATTATGGTGGTGTGTTGTGTTGTGTT  
GATTGGCCGGAGGGCCAATTTAGTA

ppa005507m

ACAAGGAGGGTATTCCCCCAGACCAGCAGAGGTTGATCTTTGCAGGCAAGCAGCTCGAGGATGGAAGGACCCTTGCTGA  
CTATAACATTCAAAGGAGTCCACTCTGCACTTGGTGTCTCCGGCTGCGTGGTGGTATGCAGATATTTGTGAAAACCTG  
ACCGGGAAAACCATTA CTCTGGAAGTGGAAAGCTCTGATACTATTGATAATGTTAAGGCCAAAATCCAGGACAAGGAGG  
GTATTTCCCCCAGACCAGCAGAGGTTGATCTTTGCAGGCAAGCAGCTCGAGGATGGAAGGACCCTTGCTGACTACAACAT  
TCAAAGGAGTCCACTCTGCACTTGGTGTCTCGACTGCGTGGTGGGATGCAGATCTTTGTGAAGACTCTGACTGGCAAG  
ACCATAACGTTGGAGGTGGAGAGTTCGGATAACAATTGATAATGTGAAGGCCAAGATTCAGGACAAGGAGGGGCATTCCTC  
CAGACCAGCAGAGGCTCATCTTTGCCGGTAAGCAGCTCGAGGATGGGAGGACTCTTGAGATTACAACATTCAGAAGGA  
GTCTACCCTTCACCTTGTCTTCGTCTCCGAGGTGGTCTCTGAATTCTGAATGATCCTTGTGGTTCCATCCTTTTCTGA  
TCAgTGAACAGTGGCTTTGTTAAGTATTTTTATTTTTGAATTTTCGTA CTTGGCTGATGGATGATGGGTACACTCAGA  
CTATCTAGTTAATAAATAAACATGCTTTGTATGTAAAAAAAAAAAAAAAAAAAA

ppa007117m

GAGTTCGTGATACCATTGATAATGTGAAAGCCAAGATTCAGGACAAGGAGGGCATTCCTCCGGACCAGCAGAGGCTCATC  
TTTGCTGGGAAGCAGCTTGAGGATGGCCGCACCCTAGCTGATTACAATATCCAAAAGGAGTCAACCCTTCACCTTAGTGC  
TTCGTCTTCGTGGGGGTATGCAAATCTTTGTCAAGACACTAACTGGGAAGACGATAACCTTGGAGGTTGAAAGCTCGGA  
TACCATAGATAAATGTCAAGGCCAAAATTCAGGATAAGGAAGGCATTTCCCTGATCAGCAGAGGCTAATCTTCGCTGGT  
AAGCAACTTGAGGATGGCCGCACCCTTGCCGATTATAACATCCAAAAGGAATCAACTCTGCACCTGGTGTCTTCGGTTGC  
GTGGTGGTATGCAAATCTTTGTGAAAACCTTTGACTGGGAAGACGATTACTTTGGAAGTGGAAAGCTCAGATACTATTGA  
CAATGTGAAGGCCAAAATCCAGGACAAGGAGGGTATCCCTCCAGACCAGCAGAGGTTGATATTTGCAGGCAAGCAGCTG  
GAGGATGGAAGGACCCTTGCCGACTACAATATTCAAAAGGAGTCGACCCTGCACCTGGTGTCTCCGTCTGCGTGGTGGGA  
TGCAGATCTTTGTGAAGACTCTGACTGGGAAGACGATAACTTTGGAGGTGGAGAGTTCTGATACCATTGATAATGTGAA  
AGCCAAGATTCAGGACAAGGAGGGCATTCCTCCGGACCAGCAGAGGCTCATCTTTGCCGGTAAGCAGCTGGAGGACGGG  
AGGACTCTTGAGATTACAACATTCAGAAGGAGTCTACCCTTCACCTTGTCTTCGTCTCCGTGGCGGTTTTCTGAAGTC  
TGAATGATGCTTGTGGTTCCATCCTTGTCCGAGCAGTGAGAAGTGACTTTTTAAAAA

**Figure S2.** Sequence of yeast two-hybrid clones.

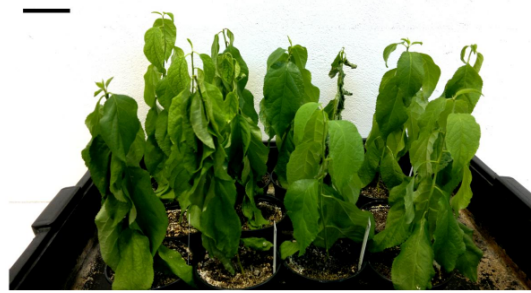

WT

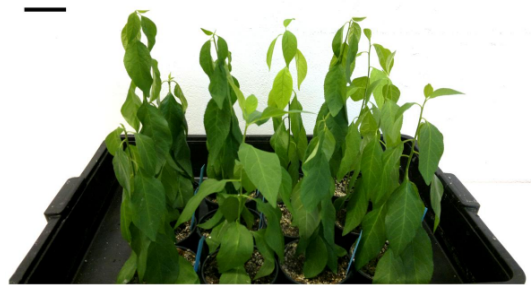

35S::PpSAP1#1

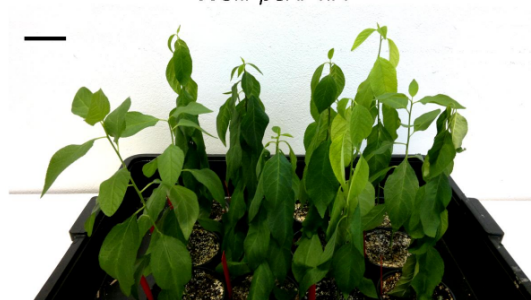

35S::PpSAP1 #5

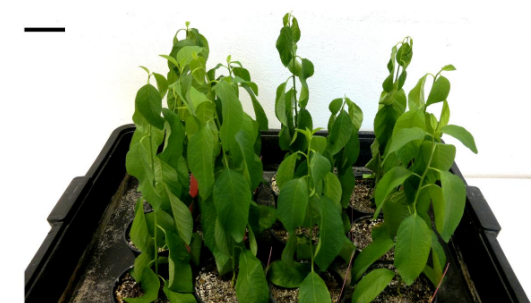

35S::PpSAP1 #6

**Figure S3.** Drought stressed plants for seven days. Two month old plants of WT and transgenic lines 35S::PpSAP1 #1, #5 and #6 are shown; scale bar, 5 cm.

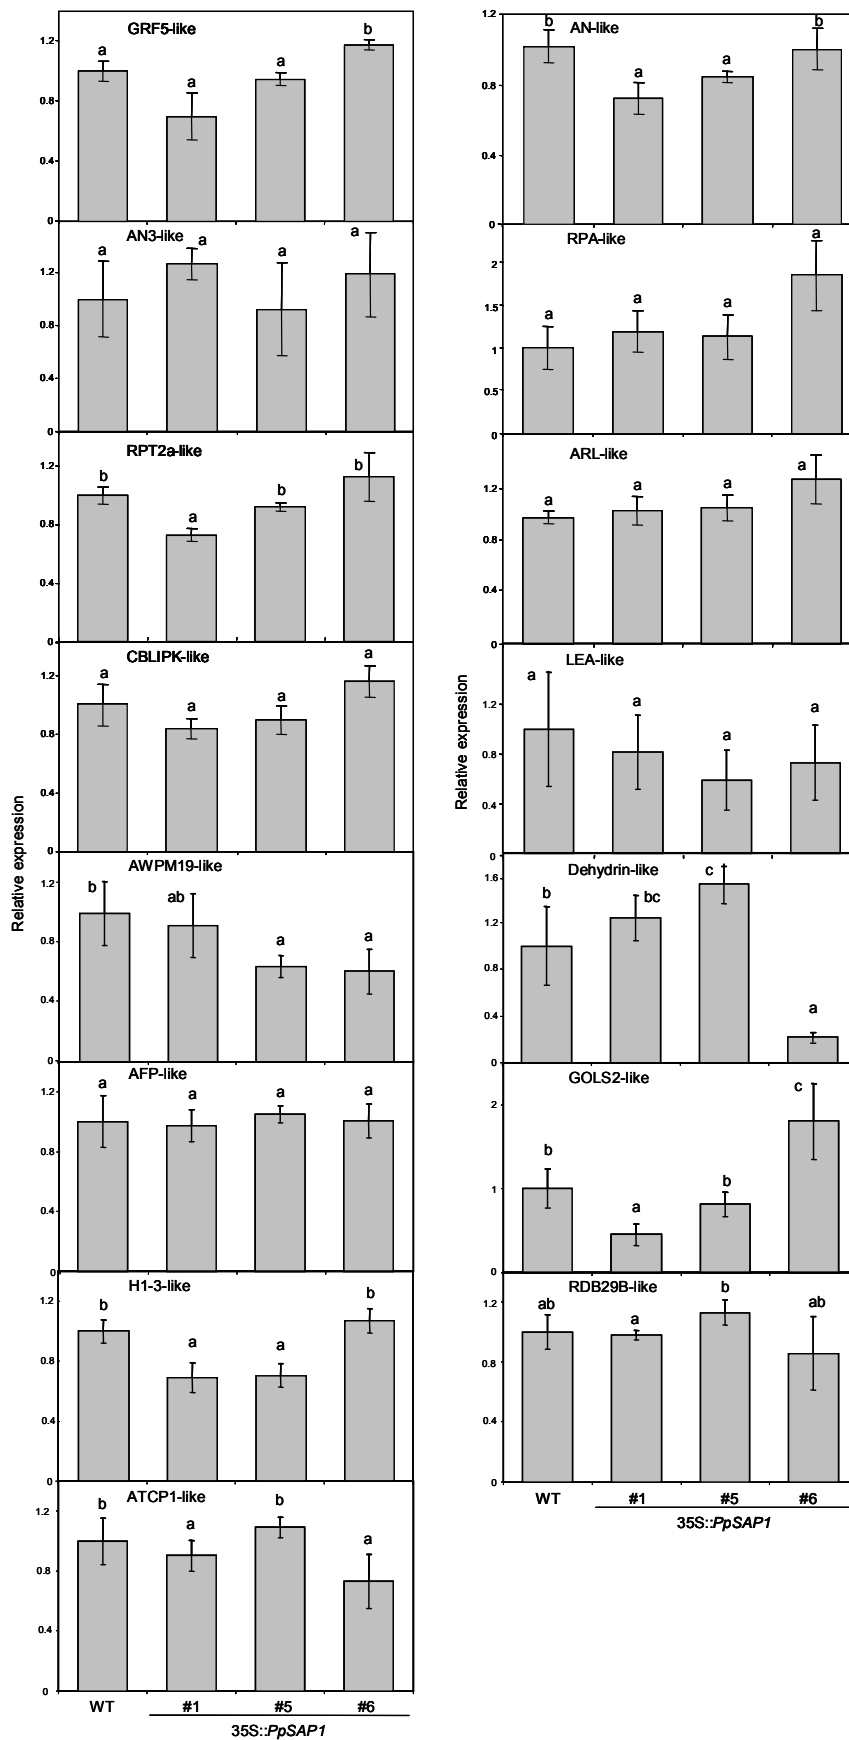

**Figure S4.** Expression of several genes assayed in transgenic plum overexpressing *PpSAP1*. An expression value of one is assigned to the WT. Data are means from three biological samples with two technical replicates each, with error bars representing standard deviation. Letters (a-b) indicate significant difference between samples.

**Table S1.** Primers used in this study.

|                                        | Forward                         | Reverse                        |
|----------------------------------------|---------------------------------|--------------------------------|
| <b>qRT-PCR in peach</b>                |                                 |                                |
| <i>PpSAP1</i>                          | ACACAGGCTTCCTCTACTCCATCTTT      | GAACCCCTCATTCGAGACATTATCAG     |
| <i>LEA</i> -like                       | TCATCTTCCGCTGCCTTTGTAGCCT       | GACACTGCCAAGAACAACCAAGGACA     |
| Tubulin-like                           | CAGATGCCCAGTGATGCCTCAG          | TGCTTGCCTGATCCAGTCTCAC         |
| AGL26-like                             | ACCACCTGAAGTCCTCCAAGATTG        | GCTTCATACAAAAGCAATGCCAACAC     |
| SAND-like                              | TCGTGGGTACCAGGAAAACGACAT        | CCTGCTAGCTTGTGTTCATCTCCA       |
| Actin-like                             | CTTCTTACTGAGGCACCCCTGAAT        | AGCATAGAGGGAGAGAAGTCTTG        |
| <b>qRT-PCR in plum</b>                 |                                 |                                |
| <i>PpSAP1</i>                          | TGATCTCAGAGGAGGACCTGCATAT       | CAAGTCCTTGTGGCATTGGAACAC       |
| Plum <i>SAP1</i> -like                 | ACACAGGCTTCCTCTACTCCATCTTT      | GAACCCCTCATTCGAGACATTATCAG     |
| <i>PpSAP1</i> + plum <i>SAP1</i> -like | AACGTGTTGGTCTAACCGGCTTCAAT      | TTGTCCAGCTTTTCTGCCTTCACAAC     |
| CBLIPK-like                            | ACCCCAATGTGGTTCAGCTCTTTGA       | AGTAATCAACAGCCCCAACCAACTG      |
| TIP-like                               | AGTTGTTGCTTGCTTACTCAAG          | GCACCAACAATCAAACCAATTGCGA      |
| GRF1-like                              | GGGGTCTATCCATTTGGGATTCTC        | TTTTTGGTCAGGAACGGCATCTCTC      |
| GRF5-like                              | GGAGGTGCAGAAGAACAGATGGTAA       | TTGAACGGTTTCTGCCTCTGTGCAT      |
| RPA-like                               | GGGTTGCTAACAAAGCAGTTTAAGAC      | GGGACCTAACATATCAACTGGAACA      |
| AN-like                                | AAAGCCTGGTGAGCTGTTGAAGGAT       | AGTATCTAGGAACCAACCACCACCT      |
| AN3-like                               | ATGTACCTGGCTGCCATTGCTGATT       | GCTTGTGCTGCATGTAATGTGCTC       |
| TOR-like                               | GCAGTACCAAAGAAGATTGGGCAGA       | GCAAATAACTCGCGCCCAACAAAT       |
| ARL-like                               | TCGTGCAACTATCACACGGTAG          | CAACAGAGTCGCCGTGAGACATATA      |
| RPT2a-like                             | GTGGCAAACCTCAACATCTGCAACT       | GTGAGAGGTCATCAGCAACCCTAA       |
| AWPM19-like                            | CCCAGCCAATATGGCGAATATCAGAA      | CATAGTGAGCAGCAGTAAGTTTGTGCT    |
| Dehydrin-like                          | GTA CTCTCATGACACCCACAAA ACTAC   | CCCGGCCCCACCCTAAGCTCCAGTT      |
| AFP-like                               | TTCCGTTGGTGGTGGAGTGGATGCA       | TTACTAGCAGGGCTTCTTGCTTCAC      |
| H1-3-like                              | AAACCGCTGCTCATCCTCCATACT        | TGCTTCTCCTCCATGTACTTGGCT       |
| RD29B-like                             | ATCTGCTAAGAACGTCGTCGCTTC        | GGCTTTGCTGTAACCTCCTGATGA       |
| ATCP1-like                             | AAGGTTATGGACAAGGACGGGGAT        | CATGGCCTTGATGTCTTCATCAGTG      |
| GOLS2-like                             | TGACCACCTGTTTGACTACCCAGA        | GCTGGCAGTACCCAATCTTGTACT       |
| <b>Two-hybrid cloning</b>              |                                 |                                |
|                                        | CCAGAATTCATGGAGCACAAACGAGACAG   | GCCGGATCCTCAGATTTTGTCCAGCTTTTC |
| <b>pROK2 cloning</b>                   |                                 |                                |
|                                        | CAGTCTAGATGGAGGAGCAGAAGCTGATCTC | GCCGGATCCTCAGATTTTGTCCAGCTTTTC |

**Table S2.** List of genes tested by qRT-PCR in transgenic plum and peach.

| Name          | Rice or <i>Arabidopsis</i> gene/protein | Peach putative ortholog | Protein similarity                     | Reference |
|---------------|-----------------------------------------|-------------------------|----------------------------------------|-----------|
| CBLIPK-like   | LOC_Os01g10890                          | ppa005365m              | CBL-interacting protein kinase         | (1)       |
| TIP-like      | LOC_Os01g74450                          | ppa010364m              | Tonoplast intrinsic protein1-3         | (1)       |
| GRF1-like     | LOC_Os03g51970                          | ppa019623m              | Growth-regulating factor 1             | (1)       |
| GRF5-like     | LOC_Os02g53690                          | ppa017593m              | Growth-regulating factor 5             | (1)       |
| RPA-like      | LOC_Os03g11540                          | ppa003038m              | Replication protein A subunit B        | (1)       |
| AN-like       | AT1G01510                               | ppa003091m              | Angustifolia                           | (2)       |
| AN3-like      | AT5G28640                               | ppa011329m              | Angustifolia3                          | (3)       |
| TOR-like      | AT1G50030                               | ppa000022m              | Serine/threonine-protein kinase TOR    | (4)       |
| ARL-like      | AT2G44080                               | ppa013582m              | Argos-like                             | (5)       |
| RPT2a-like    | AT4G29040                               | Prupe.8G208900          | 26S proteasome regulatory subunit      | (6)       |
| LEA-like      |                                         | ppa008651m              | Late embryogenesis abundant            | (7)       |
| AWPM19-like   |                                         | ppa012188m              | AWPM19                                 | (7)       |
| Dehydrin-like |                                         | Prupe.7G161100          | Dehydrin                               | (7)       |
| AFP-like      |                                         | ppa006974m              | ABI5 binding protein                   | (7)       |
| H1-3-like     | AT2G18050                               | ppa011941m              | Histone H1-3                           | (8)       |
| RD29B-like    | AT5G52300                               | ppa001989m              | Responsive to desiccation 29B          | (8)       |
| ATCP1-like    | AT5G49480                               | ppa012594m              | NaCl-inducible calcium-binding protein | (9)       |
| GOLS2-like    | AT1G56600                               | ppa008294m              | Galactinol synthase 2                  | (9)       |

(1) Dansana, P. K., Kothari, K. S., Vij, S. & Tyagi, A. K. *OsiSAP1* overexpression improves water-deficit stress tolerance in transgenic rice by affecting expression of endogenous stress-related genes. *Plant Cell Rep.* **33**, 1425–1440 (2014).

(2) Kim, G. T. *et al.* The *ANGUSTIFOLIA* gene of *Arabidopsis*, a plant CtBP gene, regulates leaf-cell expansion, the arrangement of cortical microtubules in leaf cells and expression of a gene involved in cell-wall formation. *EMBO J.* **21**, 1267–1279 (2002).

(3) Kim, J. H. & Kende, H. A transcriptional coactivator, AtGIF1, is involved in regulating leaf growth and morphology in *Arabidopsis*. *Proc. Natl. Acad. Sci. U. S. A.* **101**, 13374–13379 (2004).

(4) Menand, B. *et al.* Expression and disruption of the *Arabidopsis TOR* (target of rapamycin) gene. *Proc. Natl. Acad. Sci. U. S. A.* **99**, 6422–6427 (2002).

(5) Hu, Y., Poh, H. M. & Chua, N. H. The *Arabidopsis ARGOS-LIKE* gene regulates cell expansion during organ growth. *Plant J.* **47**, 1–9 (2006).

(6) Kurepa, J. *et al.* Loss of 26S proteasome function leads to increased cell size and decreased cell number in *Arabidopsis* shoot organs. *Plant Physiol.* **150**, 178–189 (2009).

(7) Leida, C. *et al.* Histone modifications and expression of *DAM6* gene in peach are modulated during bud dormancy release in a cultivar-dependent manner. *New Phytol.* **193**, 67–80 (2012).

(8) Giri, J. *et al.* Rice A20/AN1 zinc-finger containing stress-associated proteins (SAP1/11) and a receptor-like cytoplasmic kinase (OsRLCK253) interact via A20 zinc-finger and confer abiotic stress tolerance in transgenic *Arabidopsis* plants. *New Phytol.* **191**, 721–732 (2011).

(9) Kang, M. *et al.* *Arabidopsis* SAP5 functions as a positive regulator of stress responses and exhibits E3 ubiquitin ligase activity. *Plant Mol. Biol.* **75**, 451–466 (2011).

**Table S3.** Stability index of reference genes for real-time experiments using three methods.

|                          | <b>NormFinder</b> | <b>BestKeeper</b> | <b><math>\Delta</math>Ct</b> |
|--------------------------|-------------------|-------------------|------------------------------|
| <b>Tissues</b>           |                   |                   |                              |
| Tubulin-like             | 0.29              | 1.48              | 0.91                         |
| AGL26-like               | 0.41              | 1.91              | 1.17                         |
| SAND-like                | 0.30              | 1.61              | 0.92                         |
| Actin-like               | 0.37              | 1.39              | 1.02                         |
| <b>Reproductive buds</b> |                   |                   |                              |
| Tubulin-like             | 0.19              | 1.51              | 0.52                         |
| AGL26-like               | 0.33              | 1.73              | 0.64                         |
| SAND-like                | 0.18              | 1.21              | 0.46                         |
| Actin-like               | 0.28              | 1.15              | 0.58                         |
| <b>Stress assays</b>     |                   |                   |                              |
| Tubulin-like             | 0.45              | 1.69              | 1.07                         |
| AGL26-like               | 0.25              | 1.25              | 0.75                         |
| SAND-like                | 0.14              | 1.10              | 0.60                         |
| Actin-like               | 0.29              | 1.23              | 0.76                         |
